# Supplementary material for: Synthesis and Evaluation of Novel Norfloxacin Isonitrile 99mTc Complexes as Potential Bacterial Infection Imaging Agents
Source: MDPI journal article supplement (doi:10.3390/pharmaceutics13040518), 2021-04-09
Supplement: s1 [file s1]

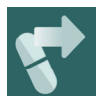

# Supplementary Materials: Synthesis and evaluation of novel norfloxacin isonitrile $^{99m}\text{Tc}$ complexes as potential bacterial infection imaging agents

Si'an Fang, Yuhao Jiang, Di Xiao, Xuran Zhang, Qianqian Gan, Qing Rua and Junbo Zhang

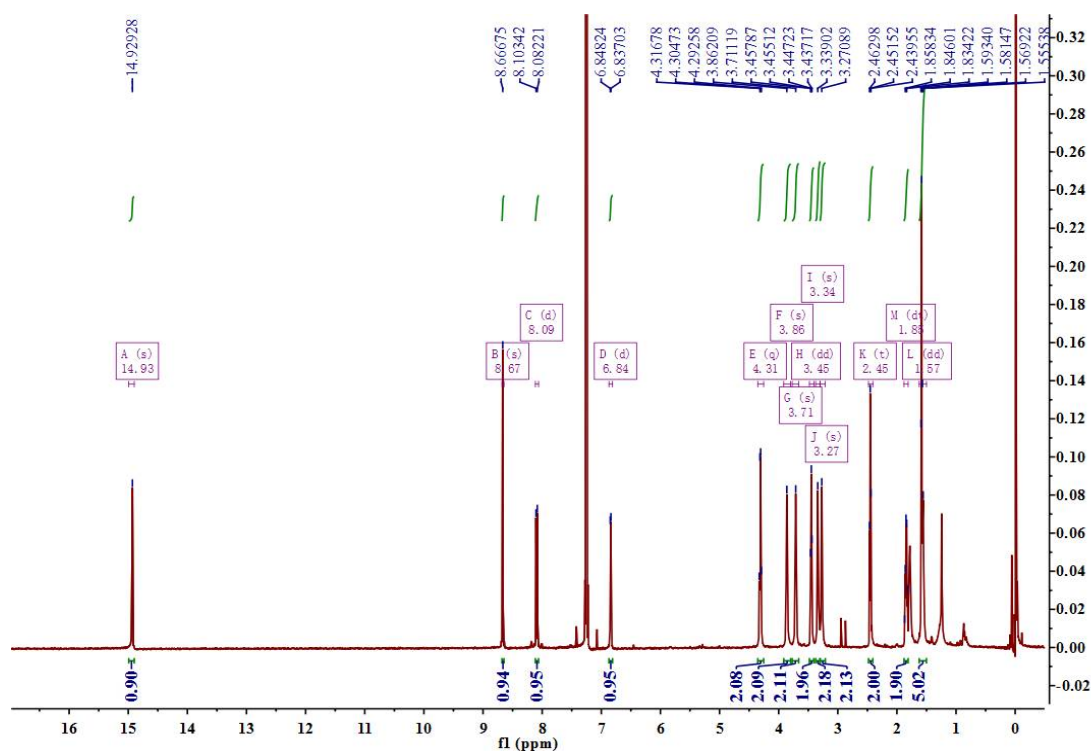

Figure S1.  $^1\text{H}$  NMR spectrum of Compound 9 (CN4NF).

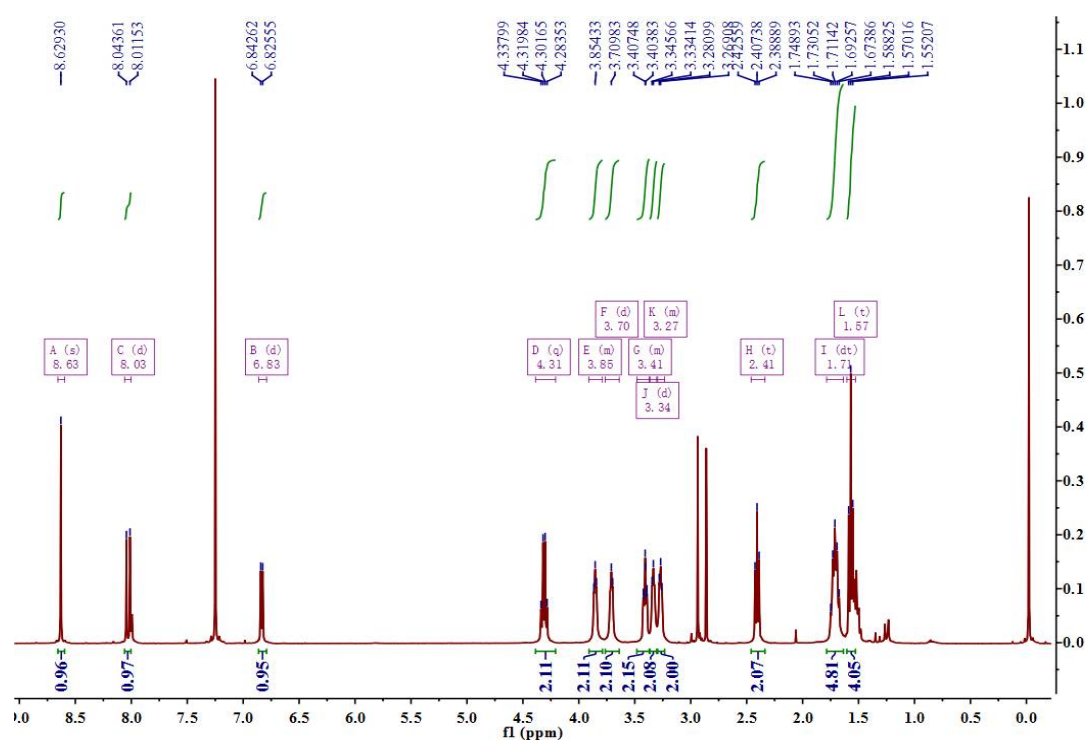Figure S2.  $^1\text{H}$  NMR spectrum of Compound 10 (CN5NF).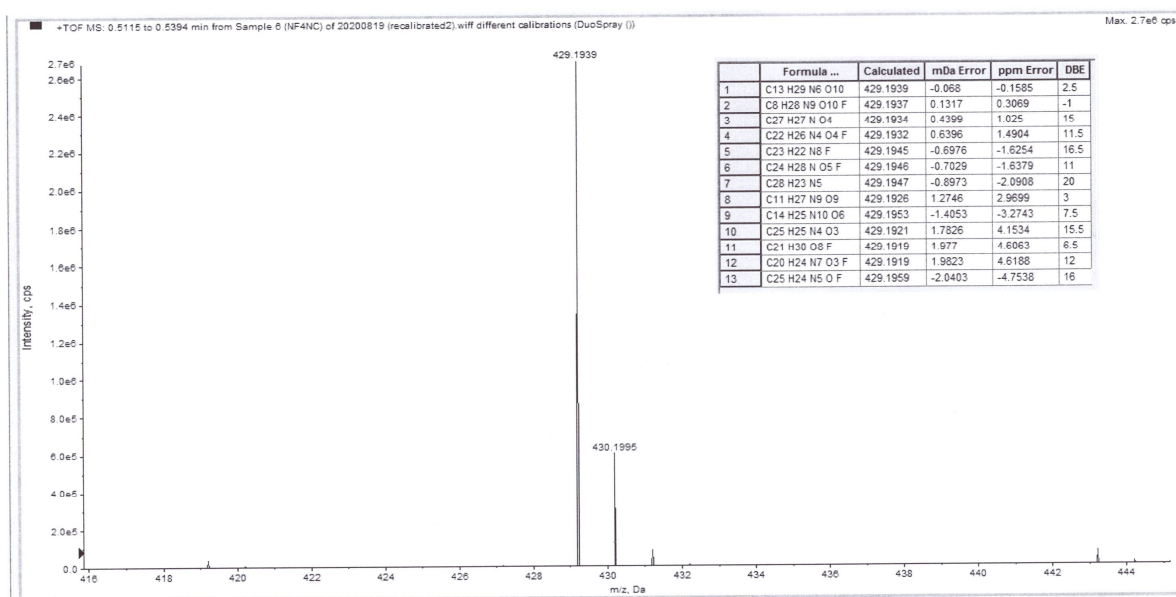

Figure S3. HR-MS spectrum of Compound 9 (CN4NF).

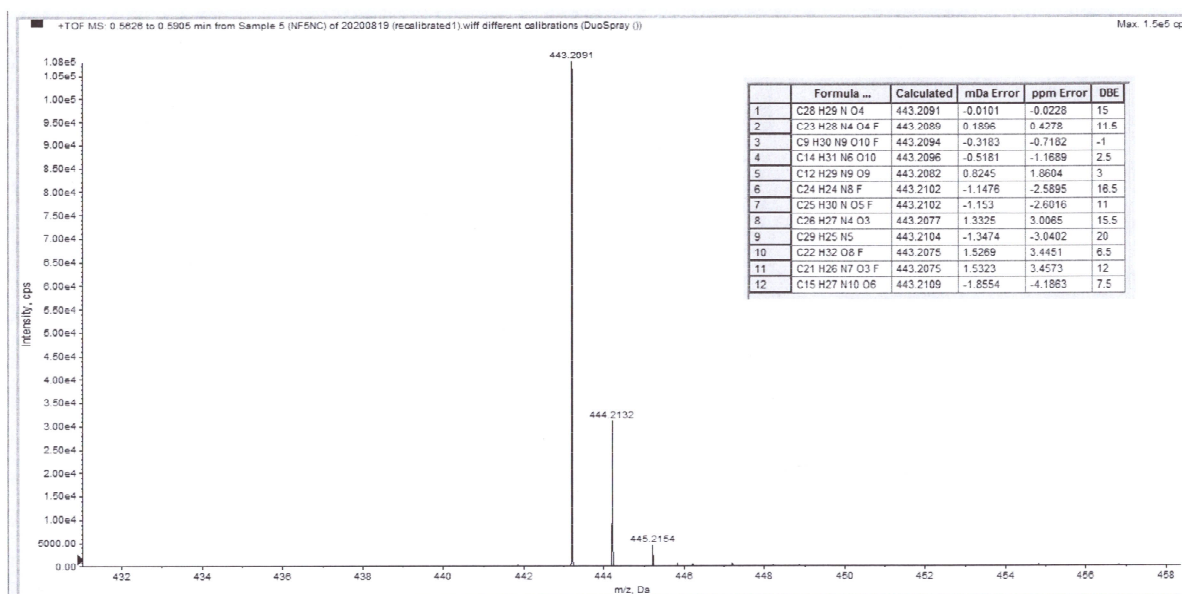

Figure S4. HR-MS spectrum of Compound 10 (CN5NF).
